# Supplementary material for: Self-powered gas sensor based on SiNWs/ITO photodiode
Source: Royal Society of Chemistry journal article supplement (doi:10.1039/c9ra02972a), 2019-01-01
Supplement: c9ra02972a1.pdf [file c9ra02972a1.pdf]

*Supporting Information*

**Self-powered gas sensor based on SiNWs/ITO photodiode**

*Dong Liu,<sup>a</sup> Qiaofen Chen,<sup>a</sup> Aimin Chen<sup>b</sup>, and Jianmin Wu<sup>\*a</sup>*

*<sup>a</sup>Institute of Analytical Chemistry, Department of Chemistry, Zhejiang University, Hangzhou, 310058, China*

*<sup>b</sup>College of Chemical Engineering, Zhejiang University of Technology, Hangzhou 310014, China*

Corresponding author: Jianmin Wu

Email address: [wjm-st1@zju.edu.cn](mailto:wjm-st1@zju.edu.cn)

## Supplementary Figures

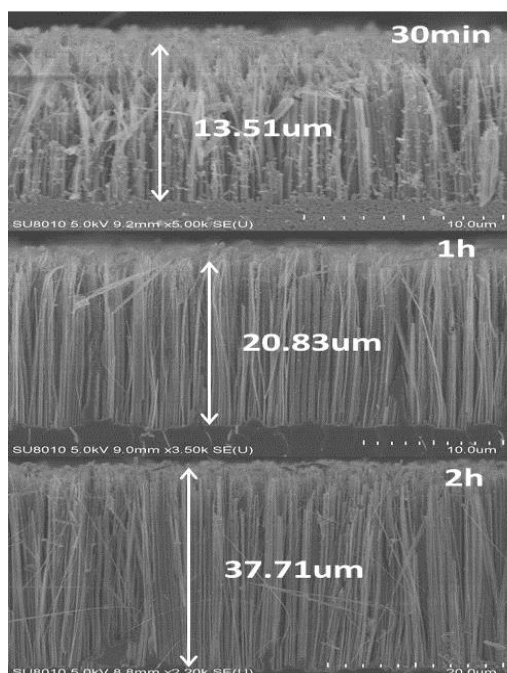

Figure. S1 The length of SiNWs etched by different time.

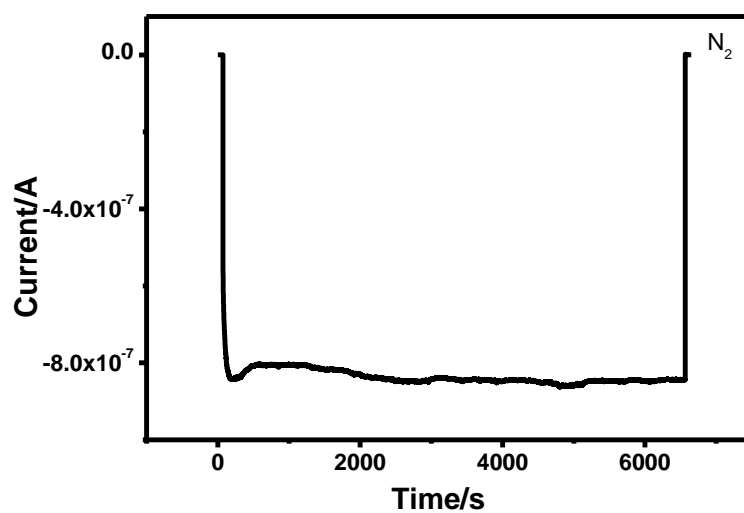

Figure. S2 The photocurrent of p-SiNWs/ ITO heterojunction under continuous illumination by LED.

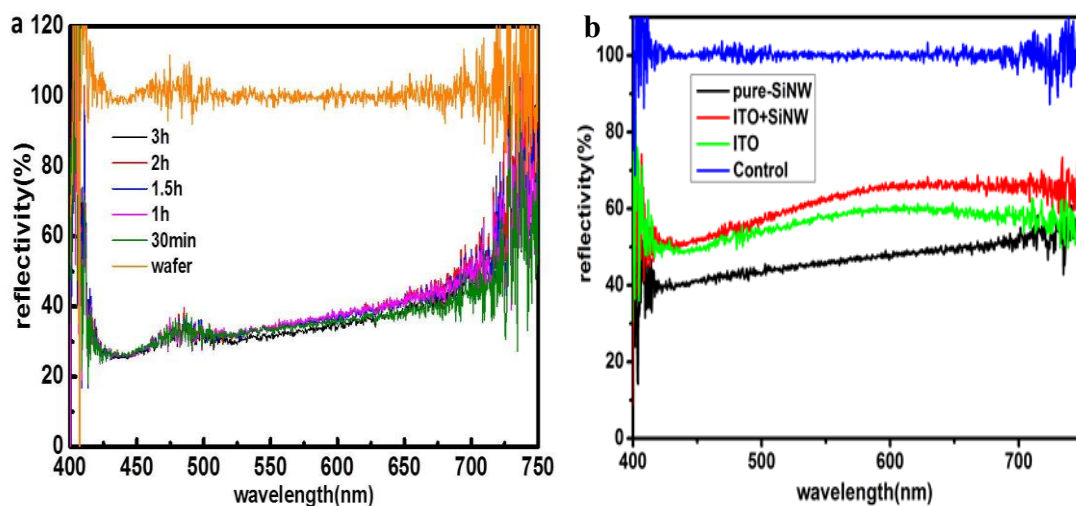

Figure. S3 (a) The reflectance of SiNWs etched with different time, (b) the comparison of reflectance between pure SiNWs and SiNWs/ITO device. The reflectance was measured with an integrating sphere.

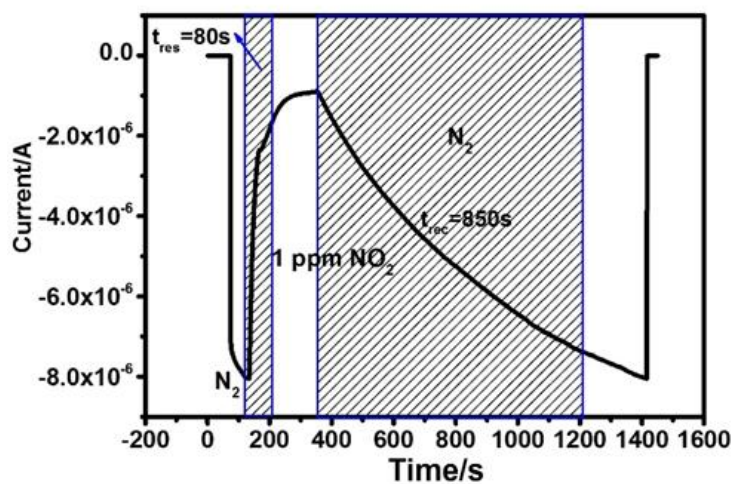

Figure. S4 Response and recovery trace of p-SiNWs/ITO in the presence of 1 ppm  $\text{NO}_2$  under illumination at room temperature.

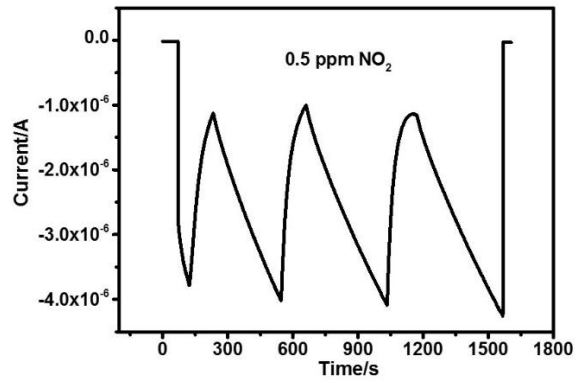

Figure. S5 The gas sensing trace of the device in response to 0.5 ppm NO<sub>2</sub> in three cyclic detection, The result indicate a good reproducibility of the sensor.

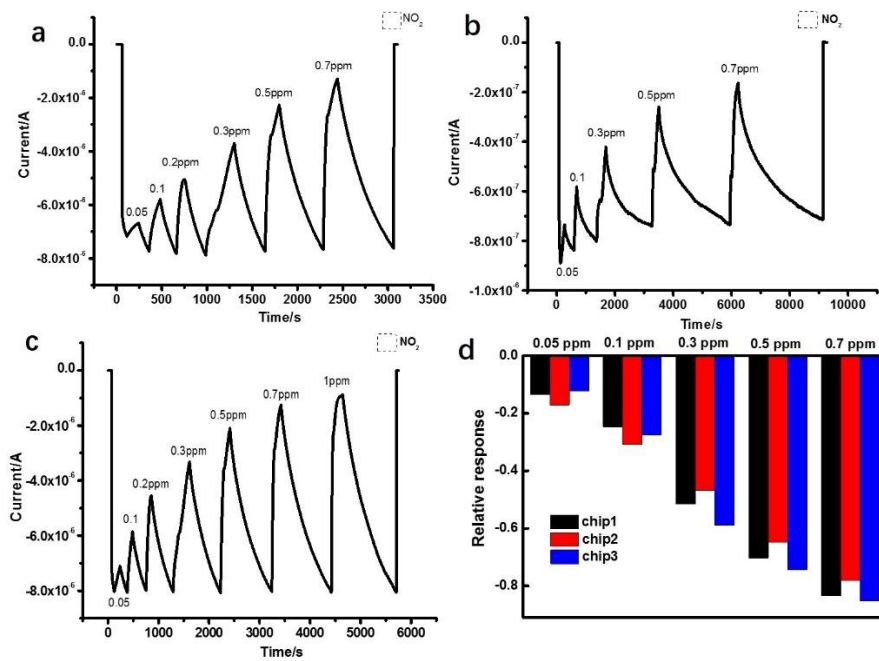

Figure. S6 The gas sensing test on three different chips to NO<sub>2</sub> gas under illumination. (a), (b), (c) represent different sensor devices, (d) was the summary of the relative response for the three chips at the same concentration. The results showed that different batch of the device display a good reproducibility.

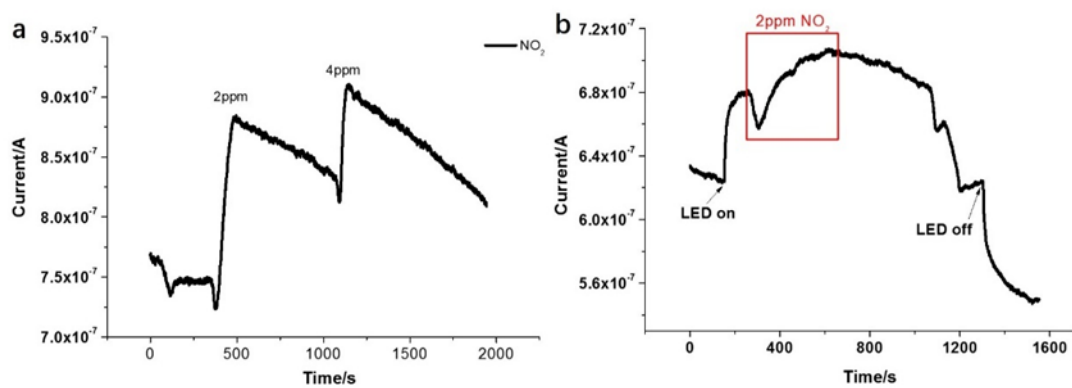

Figure. S7 The gas sensing test on a pure p-SiNWs chip to NO<sub>2</sub> gas with different concentration, (a) without and (b) with light illumination.

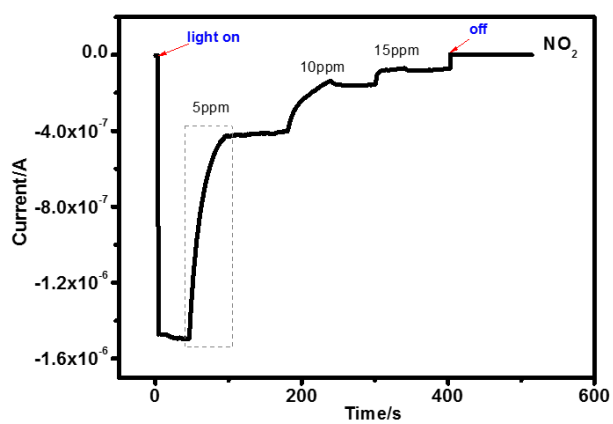

Figure. S8 The photocurrent of p-SiNWs/ ITO heterojunction without the treatment of HF.
